# Supplementary material for: Vanadyl β-tetrabromoporphyrin: synthesis, crystal structure and its use as an efficient and selective catalyst for olefin epoxidation in aqueous medium
Source: Royal Society of Chemistry journal article supplement (doi:10.1039/c8ra09825e), 2019-01-01
Supplement: c8ra09825e1.pdf [file c8ra09825e1.pdf]

*Electronic supplementary information for*

## **Vanadyl $\beta$ -tetrabromoporphyrin: Synthesis, crystal structure and its use as an efficient and selective catalyst for olefin epoxidation in aqueous medium**

Tawseef Ahmad Dar<sup>a</sup>, Reshu Tomar<sup>a</sup>, Rasel Mohammad Mian<sup>b</sup>, Muniappan Sankar<sup>\*a</sup> and M. R. Maurya<sup>\*a</sup>

| <b>Table of contents</b>                                                                                                                                                                                                                                                                                                                                               | <b>Page No.</b> |
|------------------------------------------------------------------------------------------------------------------------------------------------------------------------------------------------------------------------------------------------------------------------------------------------------------------------------------------------------------------------|-----------------|
| <b>Figure S1.</b> FT-IR spectrum of VOTPPBr <sub>4</sub> ( <b>1</b> ) using KBr pellets.                                                                                                                                                                                                                                                                               | 3               |
| <b>Figure S2:</b> (a) Simulated MALDI-TOF mass spectrum of <b>1</b> corresponding to [M+H] <sup>+</sup> ion and (b) observed (zoomed in) MALDI-TOF mass spectrum of <b>1</b> corresponding to [M+ H] <sup>+</sup> ion in CH <sub>2</sub> Cl <sub>2</sub> using HABA matrix.                                                                                            | 4               |
| <b>Figure S3.</b> Thermogram (TG), Differential thermal analysis (DTA) and Differential thermogram (DTG) of ( <b>1</b> ) at a heating rate of 10 °C /minute scanned from 25 °C to 1000 °C.                                                                                                                                                                             | 4               |
| <b>Figure S4.</b> UV-Visible spectrum of recovered catalyst <b>1</b> in CH <sub>2</sub> Cl <sub>2</sub> at 298 K showing its reversible nature.                                                                                                                                                                                                                        | 5               |
| <b>Figure S5.</b> <sup>51</sup> V-NMR recorded in DMSO-d <sub>6</sub> for (a) porphyrin <b>1</b> (b) oxidoperoxido species [VO(O <sub>2</sub> )TPPBr <sub>4</sub> ] <sup>-</sup> generated from <b>1</b> in presence of H <sub>2</sub> O <sub>2</sub> and NaHCO <sub>3</sub> (c) on adding small amount of cyclohexene and (d) on adding excess amount of cyclohexene. | 5               |
| <b>Figure S6.</b> GC trace corresponding to pure cyclohexene (substrate) as observed in gas chromatography.                                                                                                                                                                                                                                                            | 9               |
| <b>Figure S7.</b> GC traces corresponding to cyclohexene (substrate) and cyclohexene epoxide (product) chromatograms showing their respective percentages after 10 min. of reaction time.                                                                                                                                                                              | 9               |
| <b>Figure S8.</b> GC traces corresponding to cyclohexene (substrate) and cyclohexene epoxide (product) chromatograms showing their respective percentages after 20 min. of reaction time.                                                                                                                                                                              | 10              |
| <b>Figure S9.</b> GC traces corresponding to cyclohexene (substrate) and cyclohexene epoxide (product) chromatograms showing their respective percentages after 30 min. of reaction time.                                                                                                                                                                              | 11              |
| <b>Figure S10.</b> GC traces corresponding to cyclohexene (substrate) and cyclohexene epoxide (product) chromatograms showing their respective percentages after 30 min. of reaction time without catalyst ( <b>1</b> ) and without NaHCO <sub>3</sub> .                                                                                                               | 12              |
| <b>Figure S11.</b> GC traces corresponding to cyclohexene (substrate) and cyclohexene epoxide                                                                                                                                                                                                                                                                          | 13              |

|                                                                                                                                                                                                                        |    |
|------------------------------------------------------------------------------------------------------------------------------------------------------------------------------------------------------------------------|----|
| (product) chromatograms showing their respective percentages after 30 min. of reaction time without catalyst ( <b>1</b> ).                                                                                             |    |
| <b>Figure S12.</b> GC traces corresponding to cyclohexene (substrate) and cyclohexene epoxide (product) chromatograms showing their respective percentages after 30 min. of reaction time without NaHCO <sub>3</sub> . | 14 |
| <b>Figure S13.</b> GC trace corresponding to pure styrene (substrate) as observed in gas chromatography.                                                                                                               | 14 |
| <b>Figure S14.</b> GC traces corresponding to styrene (substrate) and styrene epoxide (product) chromatograms showing their respective percentages after 30 min. of reaction time.                                     | 15 |
| <b>Figure S15.</b> GC traces corresponding to bicyclo[2.2.1]heptene (substrate) and bicyclo[2.2.1]heptene epoxide (product) chromatograms showing their respective percentages after 30 min. of reaction time.         | 16 |
| <b>Figure S16.</b> GC traces corresponding to cyclohexene epoxide (product) and dodecane (internal standard).                                                                                                          | 16 |
| <b>Table S1.</b> UV-Visible spectral data of <b>1</b> in CH <sub>2</sub> Cl <sub>2</sub> at 298 K.                                                                                                                     | 3  |
| <b>Table S2.</b> Electrochemical redox data of <b>1</b> in triple distilled DCM containing 0.1 M TBAPF <sub>6</sub> as the supporting electrolyte at 298 K.                                                            | 3  |
| <b>Table S3.</b> Selected average bond lengths and bond angles for VOTPPBr <sub>4</sub> ( <b>1</b> ) calculated on the basis of DFT optimized geometry using LANL2DZ basis set.                                        | 6  |
| <b>Table S4.</b> Crystal structure data of $\mu$ -oxo dimer of VOTPPBr <sub>4</sub> ( <b>1</b> ).                                                                                                                      | 7  |
| <b>Table S5.</b> Selected average bond lengths and bond angles for $\mu$ -oxo dimer of VOTPPBr <sub>4</sub> ( <b>1</b> ) obtained from single crystal XRD studies.                                                     | 8  |

**Table S1.** UV-Visible spectral data of **1** in CH<sub>2</sub>Cl<sub>2</sub> at 298 K.

| Compound                          | B Band(s),nm<br>( $\epsilon$ in Lmol <sup>-1</sup> cm <sup>-1</sup> ) | Q band(s), nm<br>( $\epsilon$ in Lmol <sup>-1</sup> cm <sup>-1</sup> ) |
|-----------------------------------|-----------------------------------------------------------------------|------------------------------------------------------------------------|
| VOTPPBr <sub>4</sub> ( <b>1</b> ) | 435 ( $1.94 \times 10^5$ )                                            | 560 ( $1.94 \times 10^4$ ), 604 ( $6.32 \times 10^3$ ).                |

**Table S2.** Electrochemical redox data<sup>a</sup> of **1** in triple distilled DCM containing 0.1 M TBAPF<sub>6</sub> as the supporting electrolyte at 298 K.

| Porphyrin | Oxidation (V) |       | Reduction (V) |         |
|-----------|---------------|-------|---------------|---------|
|           | pI+/II+       | p0/I+ | p0/-          | pI-/II- |
| <b>1</b>  | 1.46          | 1.28  | -0.84         | -1.06   |

<sup>a</sup>vs. Ag/AgCl reference electrode, Pt working and Pt wire auxiliary electrode.

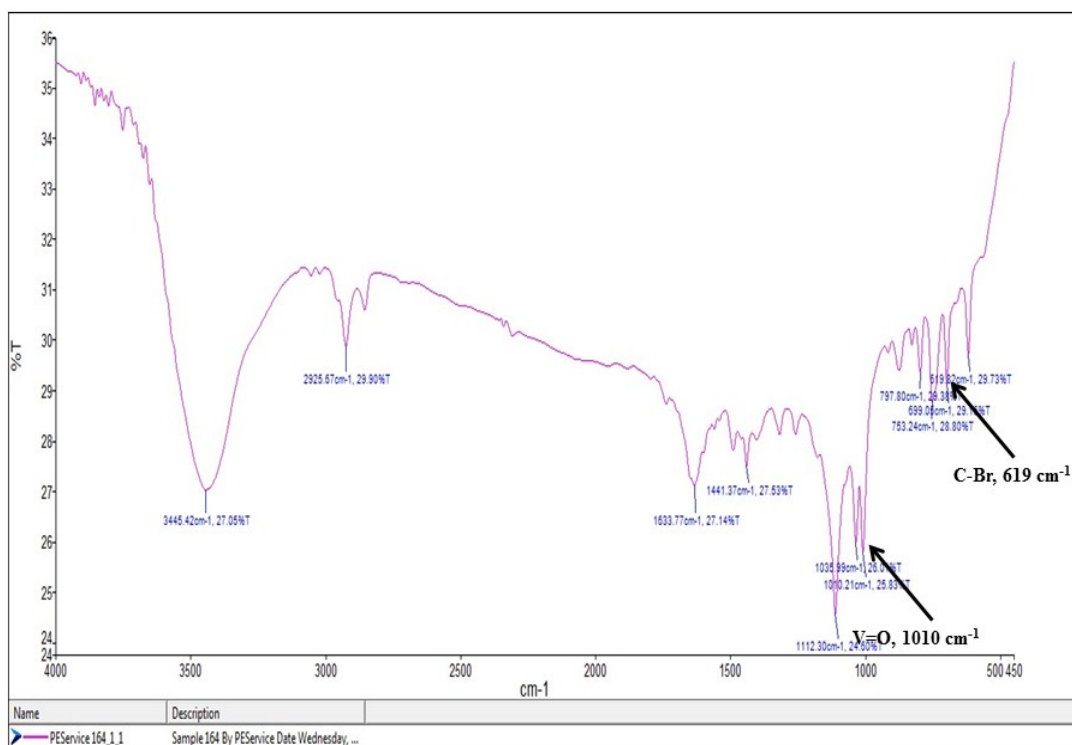

**Figure S1.** FT-IR spectrum of VOTPPBr<sub>4</sub> (**1**) using KBr pellets.

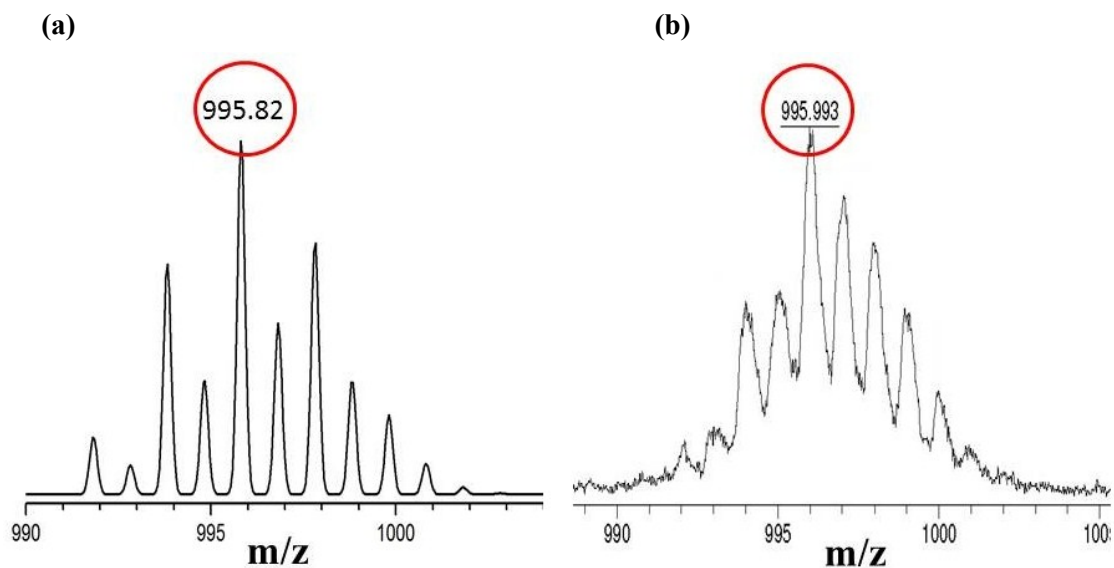

**Figure S2:** (a) Simulated MALDI-TOF mass spectrum of **1** corresponding to  $[M+ H]^+$  ion and (b) observed (zoomed in) MALDI-TOF mass spectrum of **1** corresponding to  $[M+ H]^+$  ion in  $CH_2Cl_2$  using HABA matrix.

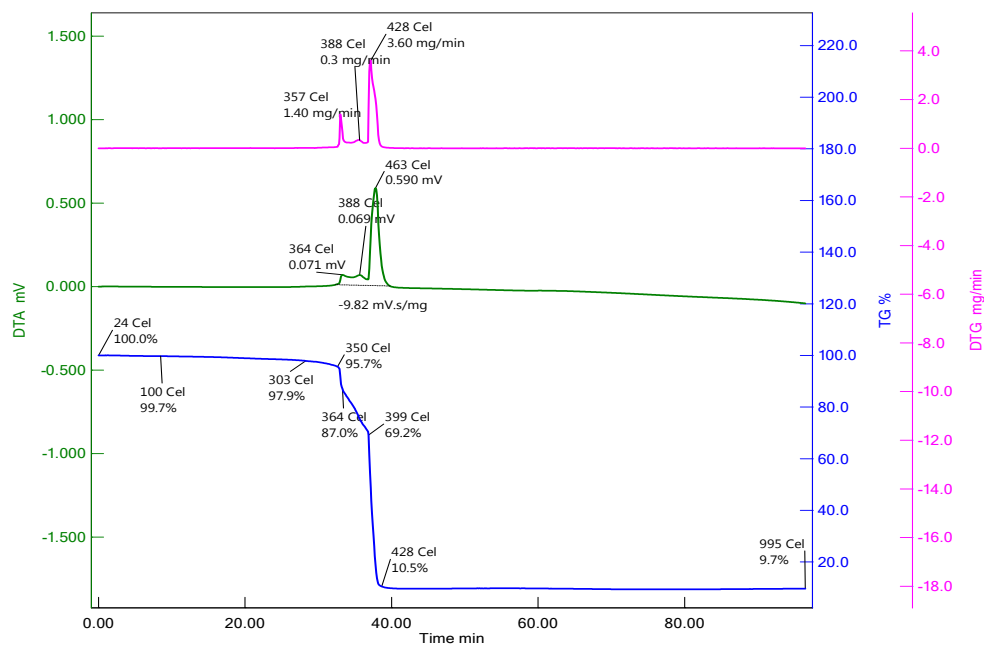

**Figure S3.** Thermogram (TG), Differential thermal analysis (DTA) and Differential thermogram (DTG) of (**1**) at a heating rate of 10 °C /minute scanned from 25 °C to 1000 °C.

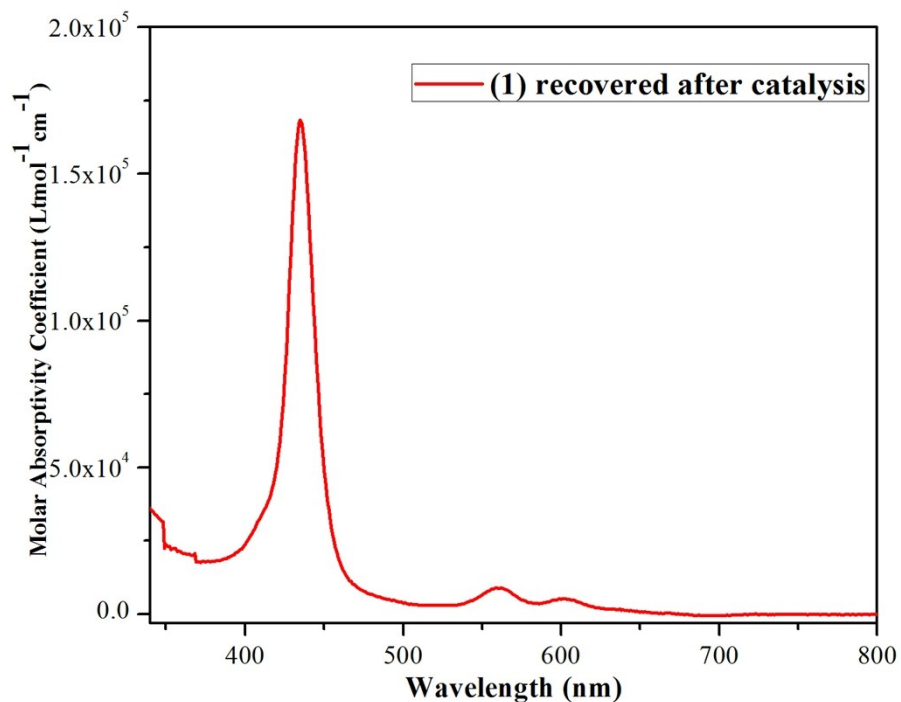

**Figure S4.** UV-Visible spectrum of recovered catalyst **1** in  $\text{CH}_2\text{Cl}_2$  at 298 K showing its reversible nature.

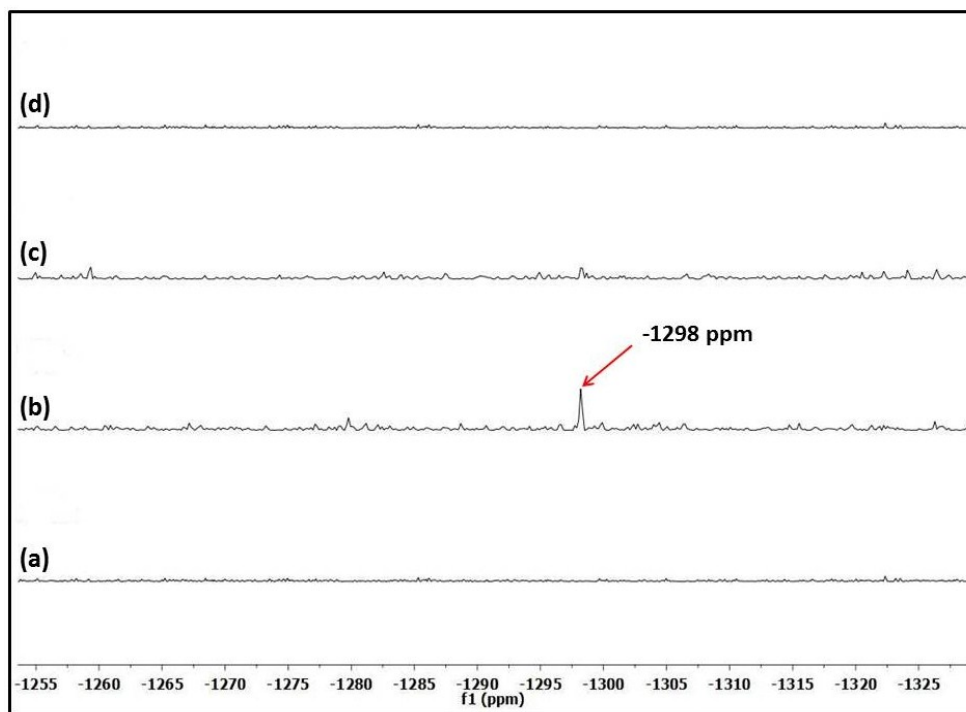

**Figure S5.**  $^{51}\text{V}$ -NMR recorded in  $\text{DMSO-d}_6$  for (a) porphyrin **1** (b) oxidoperoxido species  $[\text{VO}(\text{O}_2)\text{TPPBr}_4]^-$  generated from **1** in presence of  $\text{H}_2\text{O}_2$  and  $\text{NaHCO}_3$  (c) on adding small amount of cyclohexene and (d) on adding excess amount of cyclohexene.

**Table S3.** Selected average bond lengths and bond angles for VOTPPBr<sub>4</sub> (**1**) calculated on the basis of DFT optimized geometry using LANL2DZ basis set.

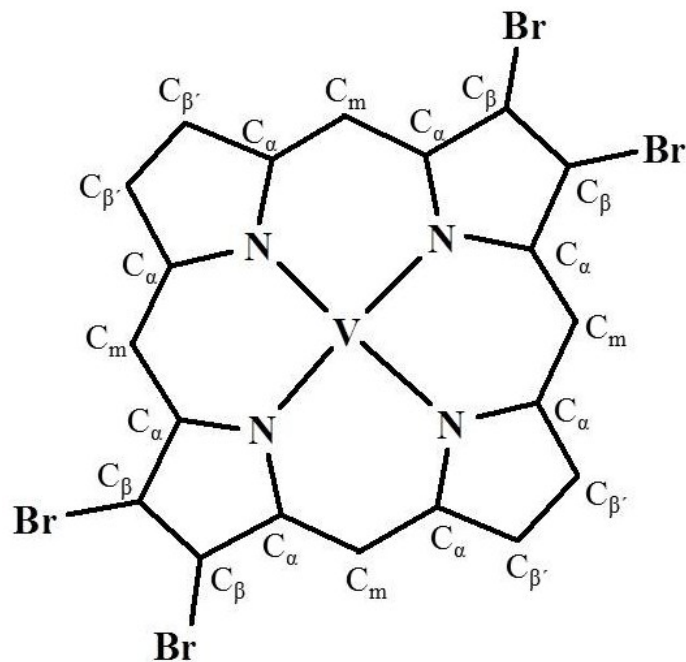

| Bond Lengths (Å)                 |       | Bond Angles (°)                                  |         |
|----------------------------------|-------|--------------------------------------------------|---------|
| N-C <sub>α</sub>                 | 1.401 | N-C <sub>α</sub> -C <sub>m</sub>                 | 124.985 |
| C <sub>α</sub> -C <sub>β</sub>   | 1.454 | N-C <sub>α</sub> -C <sub>β</sub>                 | 108.48  |
| C <sub>α</sub> -C <sub>β'</sub>  | 1.452 | N-C <sub>α</sub> -C <sub>β'</sub>                | 109.47  |
| C <sub>β</sub> -C <sub>β</sub>   | 1.379 | C <sub>β</sub> -C <sub>α</sub> -C <sub>m</sub>   | 126.99  |
| C <sub>β'</sub> -C <sub>β'</sub> | 1.372 | C <sub>β'</sub> -C <sub>α</sub> -C <sub>m</sub>  | 124.91  |
| C <sub>α</sub> -C <sub>m</sub>   | 1.411 | C <sub>α</sub> -C <sub>β</sub> -C <sub>β</sub>   | 107.61  |
| M-N                              | 2.077 | C <sub>α</sub> -C <sub>β'</sub> -C <sub>β'</sub> | 107.33  |
| ΔC <sub>β</sub>                  | 0.855 | C <sub>α</sub> -N-C <sub>α</sub>                 | 106.725 |
| ΔC <sub>β'</sub>                 | 0.725 | M-N-C <sub>α</sub>                               | 124.58  |
| Δ24                              | 0.383 | N-M-N                                            | 152.145 |
| ΔC <sub>α</sub>                  | 0.291 |                                                  |         |
| ΔC <sub>m</sub>                  | 0.065 |                                                  |         |
| ΔN                               | 0.071 |                                                  |         |
| ΔM                               | 0.538 |                                                  |         |
| V=O                              | 1.379 |                                                  |         |

**Table S4.** Crystal structure data of  $\mu$ -oxo dimer of VOTPPBr<sub>4</sub> (**1**).

|                                         | <b>1</b>                                                                                     |
|-----------------------------------------|----------------------------------------------------------------------------------------------|
| Empirical formula                       | C <sub>88</sub> H <sub>48</sub> Br <sub>8</sub> N <sub>8</sub> O <sub>2</sub> V <sub>2</sub> |
| Formula wt.                             | 1974.42                                                                                      |
| Crystal system                          | Monoclinic                                                                                   |
| Space group                             | P 2/c                                                                                        |
| <i>a</i> (Å)                            | 29.844 (9)                                                                                   |
| <i>b</i> (Å)                            | 13.822 (4)                                                                                   |
| <i>c</i> (Å)                            | 19.654 (7)                                                                                   |
| $\alpha$ (°)                            | 90                                                                                           |
| $\beta$ (°)                             | 107.719 (3)                                                                                  |
| $\gamma$ (°)                            | 90                                                                                           |
| Volume (Å <sup>3</sup> )                | 7723 (4)                                                                                     |
| <i>Z</i>                                | 8                                                                                            |
| D <sub>calcd</sub> (mg/m <sup>3</sup> ) | 1.698                                                                                        |
| $\lambda$ (Å)                           | 0.71073                                                                                      |
| T (K)                                   | 100                                                                                          |
| No. of total reflns.                    | 5465                                                                                         |
| No. of indepnt. reflns.                 | 3875                                                                                         |
| R                                       | 4.75                                                                                         |
| R <sub>w</sub>                          | 11.44                                                                                        |
| CCDC No.                                | 1880991                                                                                      |

**Table S5.** Selected average bond lengths and bond angles for  $\mu$ -oxo dimer of VOTPPBr<sub>4</sub> (**1**) obtained from single crystal XRD studies.

| <b>1</b>                                              |                |
|-------------------------------------------------------|----------------|
| <b>Bond Length (Å)</b>                                |                |
| N-C <sub>α</sub>                                      | 1.378          |
| C <sub>α</sub> -C <sub>β</sub>                        | 1.439          |
| C <sub>α</sub> -C <sub>β'</sub>                       | 1.454          |
| C <sub>β</sub> -C <sub>β</sub>                        | 1.356          |
| C <sub>β'</sub> -C <sub>β'</sub>                      | 1.342          |
| C <sub>α</sub> -C <sub>m</sub>                        | 1.402          |
| M-N                                                   | 2.082          |
| ΔC <sub>β</sub>                                       | 0.663          |
| ΔC <sub>β'</sub>                                      | 0.535          |
| Δ24                                                   | 0.3236         |
| ΔC <sub>α</sub>                                       | 0.214          |
| ΔC <sub>m</sub>                                       | 0.243          |
| ΔN                                                    | 0.070          |
| ΔM                                                    | 0.538          |
| V-V                                                   | 3.534          |
| V=O                                                   | 1.769          |
| <b>Bond Angle (°)</b>                                 |                |
| N-C <sub>α</sub> -C <sub>m</sub>                      | 124.671        |
| N-C <sub>α</sub> -C <sub>β</sub>                      | 109.172        |
| N-C <sub>α</sub> -C <sub>β'</sub>                     | 109.402        |
| C <sub>β</sub> -C <sub>α</sub> -C <sub>m</sub>        | 127.145        |
| C <sub>β'</sub> -C <sub>α</sub> -C <sub>m</sub>       | 124.700        |
| C <sub>α</sub> -C <sub>β</sub> -C <sub>β</sub>        | 107.380        |
| C <sub>α</sub> -C <sub>β'</sub> -C <sub>β'</sub>      | 107.265        |
| C <sub>α</sub> -N-C <sub>α</sub>                      | 106.607        |
| M-N-C <sub>α</sub>                                    | 124.691        |
| N-M-N                                                 | 152.290        |
| <b>Mean dihedral angle Relative to Mean Plane (°)</b> |                |
| <i>meso</i> -Ph                                       | 60.31, 54.79   |
| Pyrrole                                               | 14.185, 19.925 |



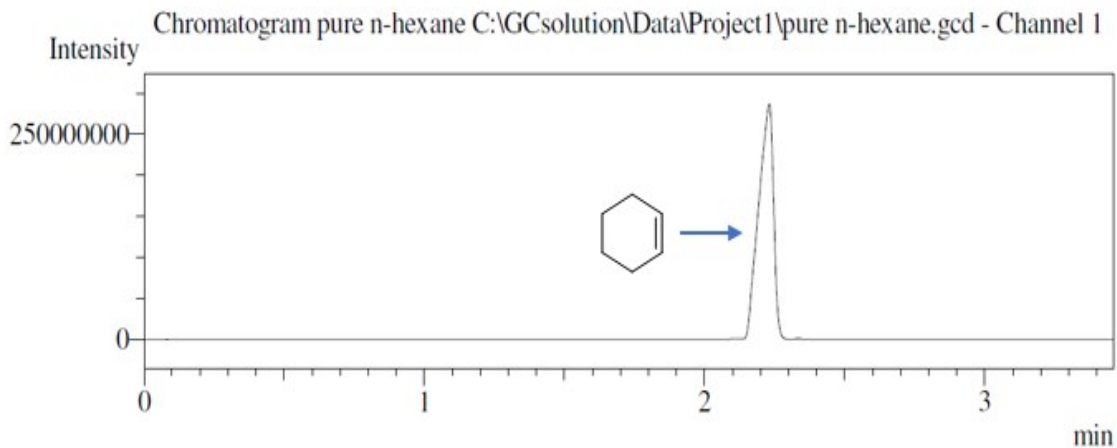

**Figure S6.** GC trace corresponding to pure cyclohexene (substrate) as observed in gas chromatography.

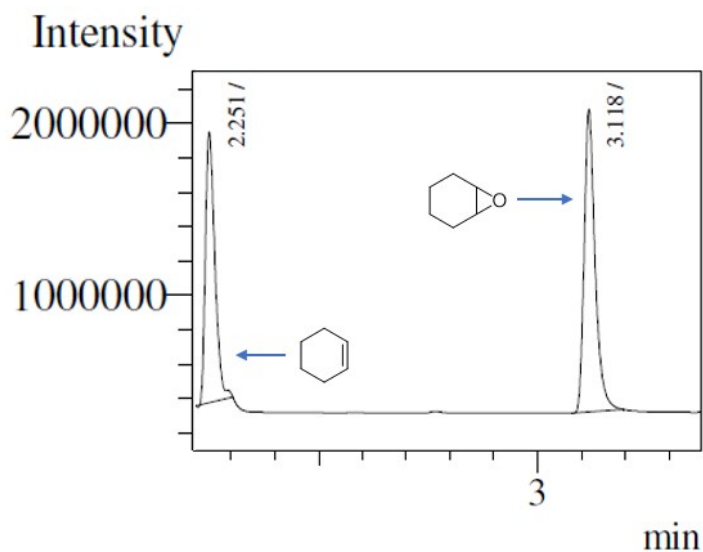

sample information - Channel 1

| Name         | Peak# | Ret.Time | Area    | Area%    |
|--------------|-------|----------|---------|----------|
|              | 1     | 2.251    | 2745024 | 43.6512  |
|              | 2     | 3.118    | 3543522 | 56.3488  |
| <b>Total</b> |       |          | 6288546 | 100.0000 |

**Figure S7.** GC traces corresponding to cyclohexene (substrate) and cyclohexene epoxide (product) chromatograms showing their respective percentages after 10 min. of reaction time.

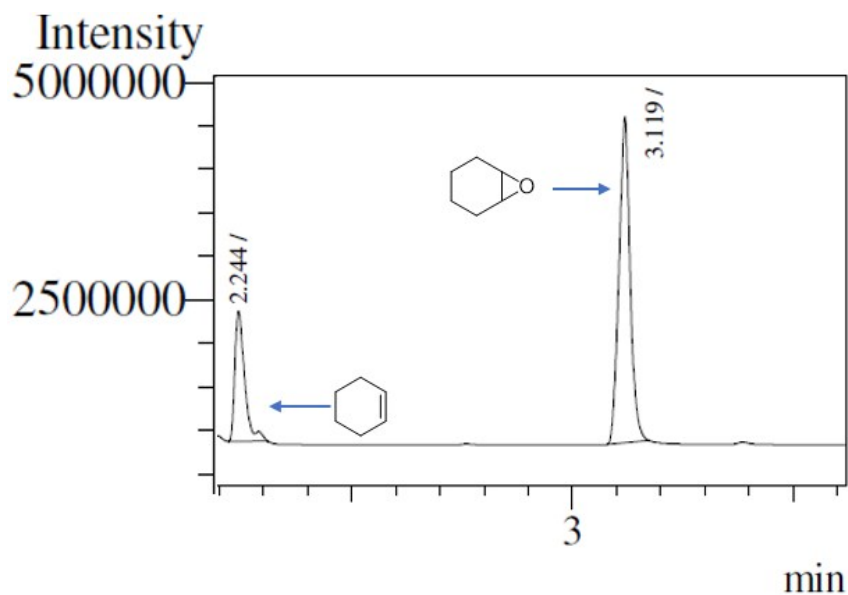

sample information - Channel 1

| Name         | Peak# | Ret.Time | Area     | Area%    |
|--------------|-------|----------|----------|----------|
|              | 1     | 2.244    | 2777533  | 26.1562  |
|              | 2     | 3.119    | 7841476  | 73.8438  |
| <b>Total</b> |       |          | 10619009 | 100.0000 |

**Figure S8.** GC traces corresponding to cyclohexene (substrate) and cyclohexene epoxide (product) chromatograms showing their respective percentages after 20 min. of reaction time.

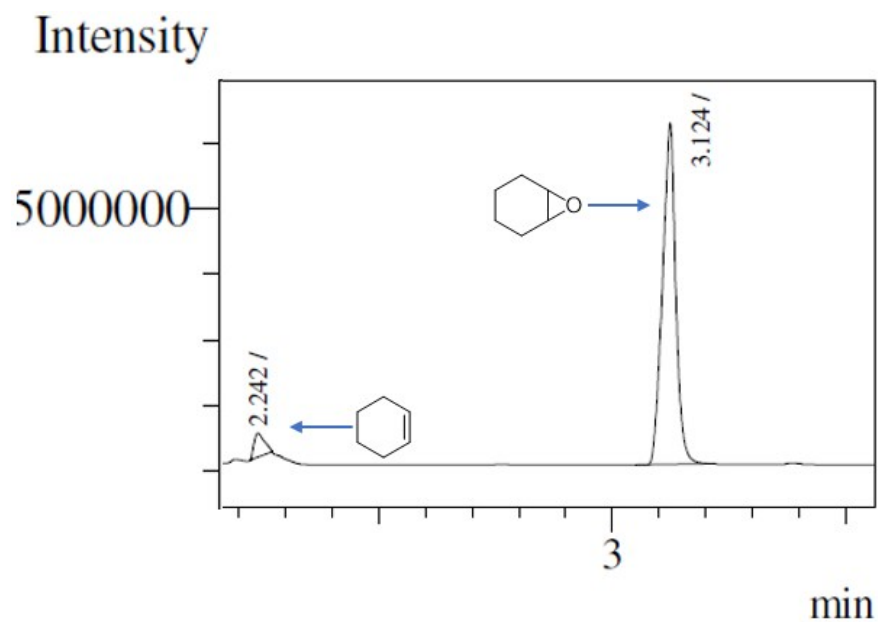

sample information - Channel 1

| Name         | Peak# | Ret.Time | Area     | Area%    |
|--------------|-------|----------|----------|----------|
|              | 1     | 2.242    | 655434   | 5.0729   |
|              | 2     | 3.124    | 12264788 | 94.9271  |
| <b>Total</b> |       |          | 12920222 | 100.0000 |

**Figure S9.** GC traces corresponding to cyclohexene (substrate) and cyclohexene epoxide (product) chromatograms showing their respective percentages after 30 min. of reaction time.

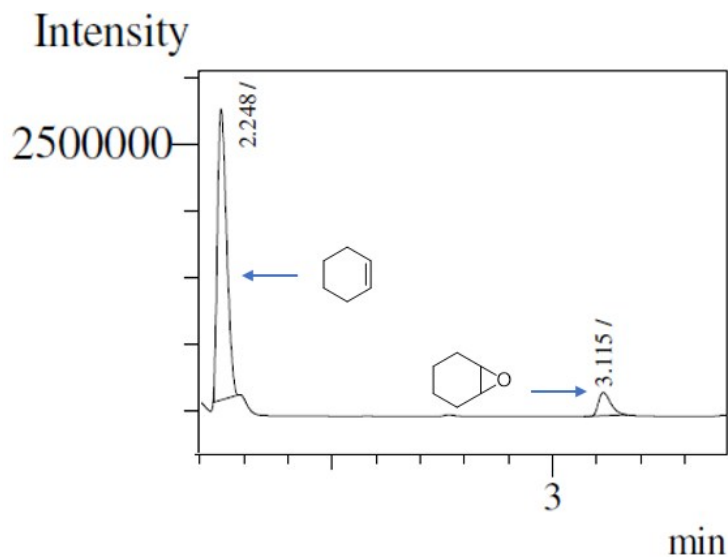

sample information - Channel 1

| Name         | Peak# | Ret.Time | Area    | Area%    |
|--------------|-------|----------|---------|----------|
|              | 1     | 2.248    | 3714525 | 90.4169  |
|              | 2     | 3.115    | 393696  | 9.5831   |
| <b>Total</b> |       |          | 4108221 | 100.0000 |

**Figure S10.** GC traces corresponding to cyclohexene (substrate) and cyclohexene epoxide (product) chromatograms showing their respective percentages after 30 min. of reaction time without catalyst (1) and without  $\text{NaHCO}_3$ .

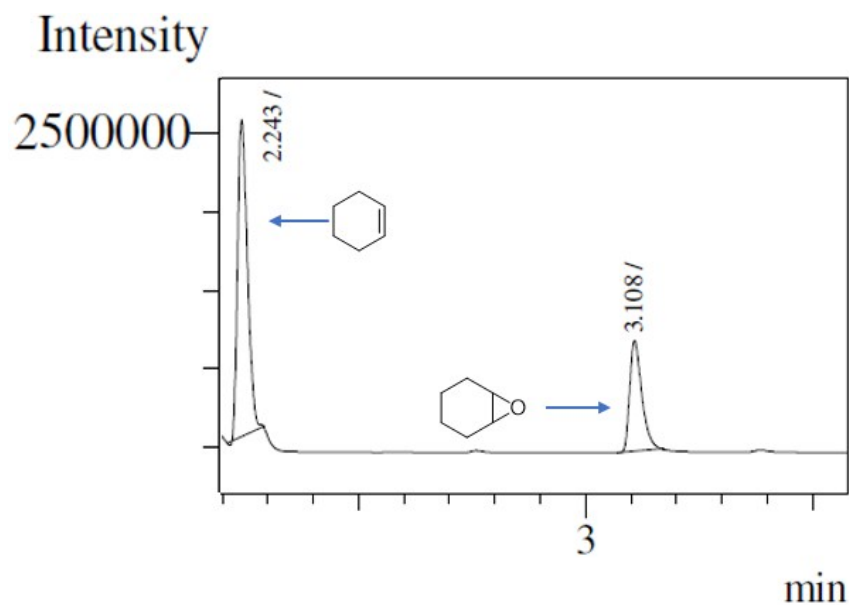

sample information - Channel 1

| Name         | Peak# | Ret.Time | Area           | Area%           |
|--------------|-------|----------|----------------|-----------------|
|              | 1     | 2.243    | 3622797        | 70.0237         |
|              | 2     | 3.108    | 1550877        | 29.9763         |
| <b>Total</b> |       |          | <b>5173674</b> | <b>100.0000</b> |

**Figure S11.** GC traces corresponding to cyclohexene (substrate) and cyclohexene epoxide (product) chromatograms showing their respective percentages after 30 min. of reaction time without catalyst (**1**).

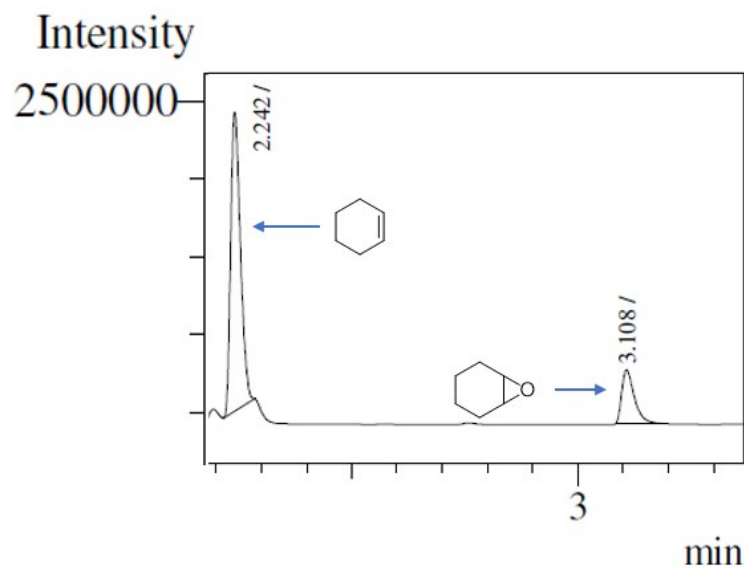

sample information - Channel 1

| Name         | Peak# | Ret. Time | Area    | Area%    |
|--------------|-------|-----------|---------|----------|
|              | 1     | 2.242     | 3416842 | 81.2830  |
|              | 2     | 3.108     | 786795  | 18.7170  |
| <b>Total</b> |       |           | 4203637 | 100.0000 |

**Figure S12.** GC traces corresponding to cyclohexene (substrate) and cyclohexene epoxide (product) chromatograms showing their respective percentages after 30 min. of reaction time without  $\text{NaHCO}_3$ .

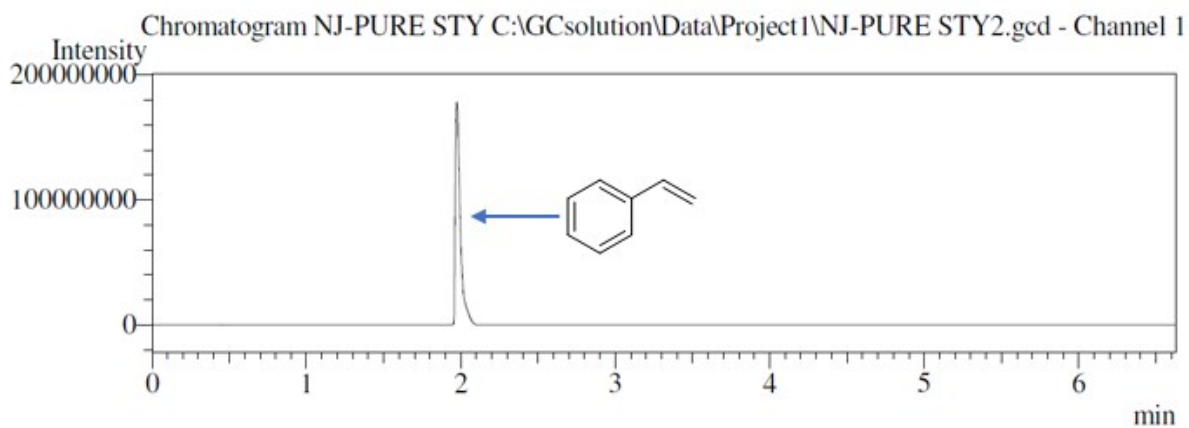

**Figure S13.** GC trace corresponding to pure styrene (substrate) as observed in gas chromatography.

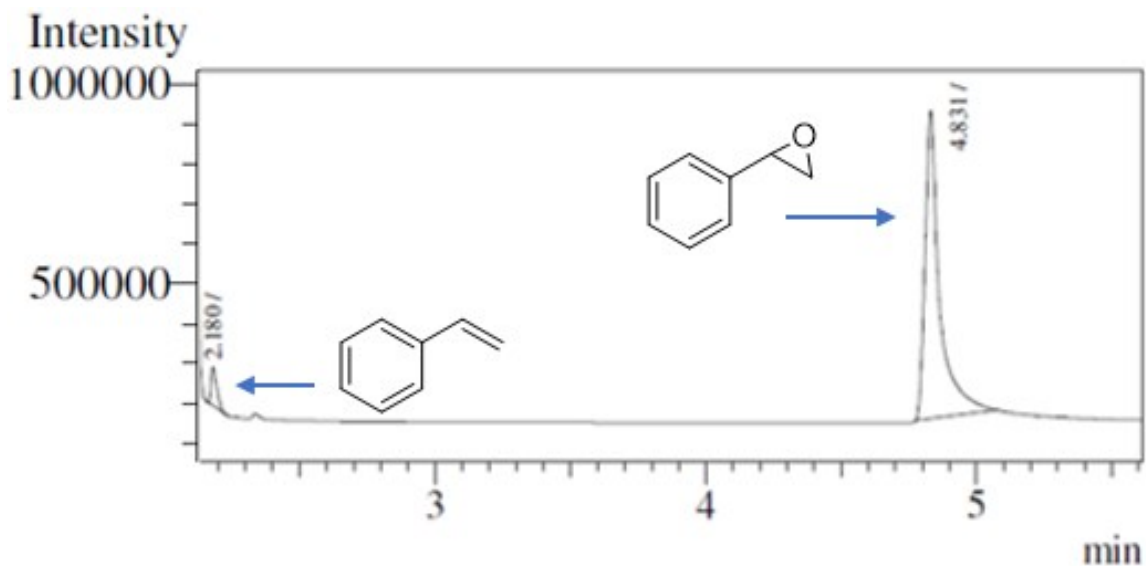

sample information - Channel 1

| Name         | Peak# | Ret.Time | Area    | Area%    |
|--------------|-------|----------|---------|----------|
|              | 1     | 2.180    | 158744  | 4.4825   |
|              | 2     | 4.831    | 3382678 | 95.5175  |
| <b>Total</b> |       |          | 3541422 | 100.0000 |

**Figure S14.** GC traces corresponding to styrene (substrate) and styrene epoxide (product) chromatograms showing their respective percentages after 30 min. of reaction time.

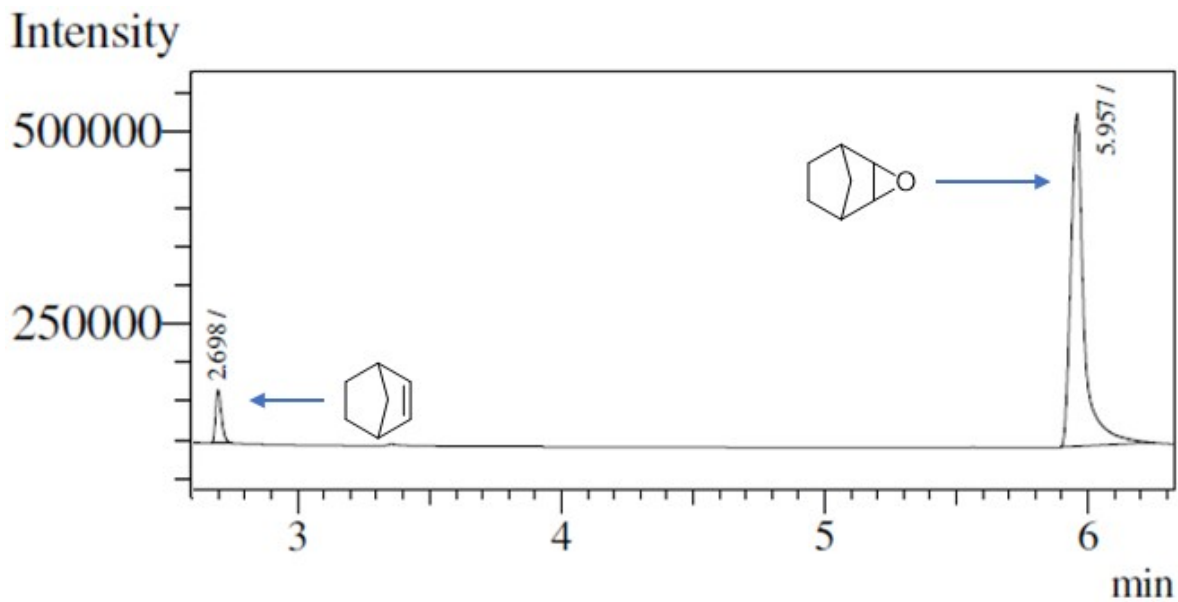

sample information - Channel 1

| Name         | Peak# | Ret. Time | Area    | Area%    |
|--------------|-------|-----------|---------|----------|
|              | 1     | 2.698     | 124402  | 6.5446   |
|              | 2     | 5.957     | 1776441 | 93.4554  |
| <b>Total</b> |       |           | 1900843 | 100.0000 |

**Figure S15.** GC traces corresponding to bicyclo[2.2.1]heptene (substrate) and bicyclo[2.2.1]heptene epoxide (product) chromatograms showing their respective percentages after 30 min. of reaction time.

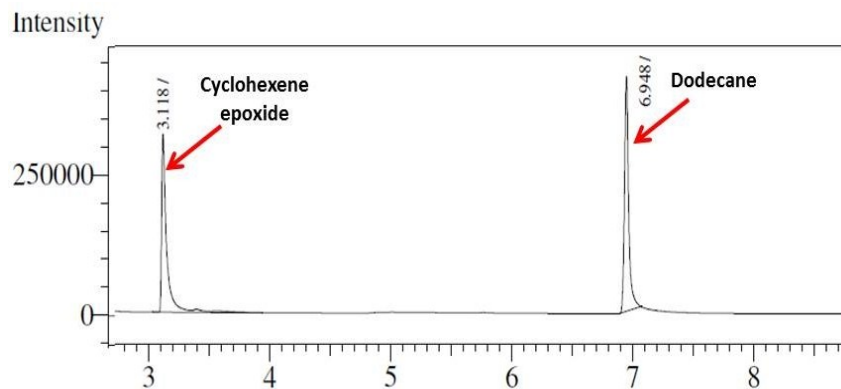

sample information - Channel 1

| Peak# | Ret. Time | Area    | Area%    |
|-------|-----------|---------|----------|
| 1     | 3.118     | 921469  | 48.1272  |
| 2     | 6.948     | 993184  | 51.8728  |
|       |           | 1914653 | 100.0000 |

**Figure S16.** GC traces corresponding to cyclohexene epoxide (product) and dodecane (internal standard).
